# Supplementary material for: Acoustic and language-specific sources for phonemic abstraction from speech
Source: PubMed Central journal article supplement (PMC10805762; doi:10.1038/s41467-024-44844-9), 2024-01-23
Supplement: 41467_2024_44844_MOESM3_ESM.pdf [file 41467_2024_44844_MOESM3_ESM.pdf]

Corresponding author(s): Anna MaiLast updated by author(s): 3 November 2023

## Reporting Summary

Nature Portfolio wishes to improve the reproducibility of the work that we publish. This form provides structure for consistency and transparency in reporting. For further information on Nature Portfolio policies, see our [Editorial Policies](#) and the [Editorial Policy Checklist](#).

### Statistics

For all statistical analyses, confirm that the following items are present in the figure legend, table legend, main text, or Methods section.

n/a | Confirmed

- The exact sample size ( $n$ ) for each experimental group/condition, given as a discrete number and unit of measurement
- A statement on whether measurements were taken from distinct samples or whether the same sample was measured repeatedly
- The statistical test(s) used AND whether they are one- or two-sided  
*Only common tests should be described solely by name; describe more complex techniques in the Methods section.*
- A description of all covariates tested
- A description of any assumptions or corrections, such as tests of normality and adjustment for multiple comparisons
- A full description of the statistical parameters including central tendency (e.g. means) or other basic estimates (e.g. regression coefficient) AND variation (e.g. standard deviation) or associated estimates of uncertainty (e.g. confidence intervals)
- For null hypothesis testing, the test statistic (e.g.  $F$ ,  $t$ ,  $r$ ) with confidence intervals, effect sizes, degrees of freedom and  $P$  value noted  
*Give  $P$  values as exact values whenever suitable.*
- For Bayesian analysis, information on the choice of priors and Markov chain Monte Carlo settings
- For hierarchical and complex designs, identification of the appropriate level for tests and full reporting of outcomes
- Estimates of effect sizes (e.g. Cohen's  $d$ , Pearson's  $r$ ), indicating how they were calculated

*Our web collection on [statistics for biologists](#) contains articles on many of the points above.*

### Software and code

Policy information about [availability of computer code](#)

- Data collection
- Data analysis

For manuscripts utilizing custom algorithms or software that are central to the research but not yet described in published literature, software must be made available to editors and reviewers. We strongly encourage code deposition in a community repository (e.g. GitHub). See the Nature Portfolio [guidelines for submitting code & software](#) for further information.

### Data

Policy information about [availability of data](#)

All manuscripts must include a [data availability statement](#). This statement should provide the following information, where applicable:

- Accession codes, unique identifiers, or web links for publicly available datasets
- A description of any restrictions on data availability
- For clinical datasets or third party data, please ensure that the statement adheres to our [policy](#)

The datasets generated and analyzed during the current study are available in the OpenNeuro repository, registered with this DOI: doi:10.181112/openneuro.ds004703.v1.0.0.

## Research involving human participants, their data, or biological material

Policy information about studies with [human participants or human data](#). See also policy information about [sex, gender \(identity/presentation\), and sexual orientation](#) and [race, ethnicity and racism](#).

|                                                                    |                                                                                                                                                                                                                                                                                                                                                                                                                                                                                                                                                                                                                                      |
|--------------------------------------------------------------------|--------------------------------------------------------------------------------------------------------------------------------------------------------------------------------------------------------------------------------------------------------------------------------------------------------------------------------------------------------------------------------------------------------------------------------------------------------------------------------------------------------------------------------------------------------------------------------------------------------------------------------------|
| Reporting on sex and gender                                        | The gender of each participant was assigned visually and impressionistically by the corresponding author during their initial encounter with the participant. Sex/gender information for each participant was also communicated by the participant's clinical team prior to their surgery. These assignment methods were consistent for all patients for this study. Four study participants were women, and six were men. Sex/gender did not play a determining role in whether patients were selected for inclusion in the study, nor were any sex- or gender-based analyses performed as part of this study, as n were too small. |
| Reporting on race, ethnicity, or other socially relevant groupings | No race, ethnicity, or other socially relevant group information was collected.                                                                                                                                                                                                                                                                                                                                                                                                                                                                                                                                                      |
| Population characteristics                                         | Participants were 21-55 years old (mean=32), and all were diagnosed with epilepsy or related conditions requiring intracranial EEG monitoring. Participants reported normal hearing and performed within acceptable range on a battery of neuropsychological language tasks prior to surgery.                                                                                                                                                                                                                                                                                                                                        |
| Recruitment                                                        | Participants were patients undergoing intracranial EEG monitoring for epilepsy. They were recruited for research participation through their neurologist (Dr. Jerry Shih) and gave written informed consent prior to surgery. All participants performed within acceptable range on a battery of neuropsychological language tests prior to surgery, suggesting that the presence of clinical conditions (such as epilepsy) did not have undue effects on their language processing. No known self-selection biases exist.                                                                                                           |
| Ethics oversight                                                   | UC San Diego Institutional Review Board                                                                                                                                                                                                                                                                                                                                                                                                                                                                                                                                                                                              |

Note that full information on the approval of the study protocol must also be provided in the manuscript.

## Field-specific reporting

Please select the one below that is the best fit for your research. If you are not sure, read the appropriate sections before making your selection.

Life sciences  Behavioural & social sciences  Ecological, evolutionary & environmental sciences

For a reference copy of the document with all sections, see [nature.com/documents/nr-reporting-summary-flat.pdf](https://nature.com/documents/nr-reporting-summary-flat.pdf)

## Life sciences study design

All studies must disclose on these points even when the disclosure is negative.

|                 |                                                                                                                                                                                                                                                                                                                                                                                                                                                                                                                                                                                                                                                                                                                                                                                                                                                                                                                                                           |
|-----------------|-----------------------------------------------------------------------------------------------------------------------------------------------------------------------------------------------------------------------------------------------------------------------------------------------------------------------------------------------------------------------------------------------------------------------------------------------------------------------------------------------------------------------------------------------------------------------------------------------------------------------------------------------------------------------------------------------------------------------------------------------------------------------------------------------------------------------------------------------------------------------------------------------------------------------------------------------------------|
| Sample size     | Number of participants was arbitrarily pre-established to be ten. Results are qualitatively consistent across all participants suggesting that this sample is not anomalous for this population (patients undergoing intracranial neuromonitoring). Stimuli were designed so that each participant would listen to at least 100 tokens of each speech sound of interest. The number 100 was determined semi-arbitrarily, through comparison with sample sizes used in other studies with similar designs. In particular, Boudewyn et al. (2017, Psychophysiology) show that depending on the ERP component(s) anticipated, anywhere from 6-90 repetitions per condition can be sufficient to reliably detect effects. Since we did not have strong a priori hypotheses for what components these specific speech sounds would elicit, the sample sizes for tokens of speech sounds were thus chosen to maximize the chance of observing relevant effects. |
| Data exclusions | Data containing epileptic activity were excluded from analysis because epileptic activity was assumed not to reflect normative language activity. This exclusion criterion was pre-established.                                                                                                                                                                                                                                                                                                                                                                                                                                                                                                                                                                                                                                                                                                                                                           |
| Replication     | Reported within-subjects effects were qualitatively robust across participants with the exception of the effects reported in Figure 5A and discussed in Section 4. No other reproducibility measures have been taken. No experiments have been replicated at this time.                                                                                                                                                                                                                                                                                                                                                                                                                                                                                                                                                                                                                                                                                   |
| Randomization   | Participants were not assigned to different groups. All comparisons were within-subjects.                                                                                                                                                                                                                                                                                                                                                                                                                                                                                                                                                                                                                                                                                                                                                                                                                                                                 |
| Blinding        | Investigators were not blind to the within-subjects conditions. Stimuli conditions were speech sound categories that were presented to participants as part of natural speech. Investigators were not blinded during data collection or analysis because when listening to natural speech, speech comprehension is more salient than individual speech sound segregation (i.e., investigators cannot keep track of individual speech sound categories during the course of natural speech).                                                                                                                                                                                                                                                                                                                                                                                                                                                               |

## Reporting for specific materials, systems and methods

We require information from authors about some types of materials, experimental systems and methods used in many studies. Here, indicate whether each material, system or method listed is relevant to your study. If you are not sure if a list item applies to your research, read the appropriate section before selecting a response.

## Materials &amp; experimental systems

|                                     |                                                        |
|-------------------------------------|--------------------------------------------------------|
| n/a                                 | Involvement in the study                               |
| <input checked="" type="checkbox"/> | <input type="checkbox"/> Antibodies                    |
| <input checked="" type="checkbox"/> | <input type="checkbox"/> Eukaryotic cell lines         |
| <input checked="" type="checkbox"/> | <input type="checkbox"/> Palaeontology and archaeology |
| <input checked="" type="checkbox"/> | <input type="checkbox"/> Animals and other organisms   |
| <input checked="" type="checkbox"/> | <input type="checkbox"/> Clinical data                 |
| <input checked="" type="checkbox"/> | <input type="checkbox"/> Dual use research of concern  |
| <input checked="" type="checkbox"/> | <input type="checkbox"/> Plants                        |

## Methods

|                                     |                                                            |
|-------------------------------------|------------------------------------------------------------|
| n/a                                 | Involvement in the study                                   |
| <input checked="" type="checkbox"/> | <input type="checkbox"/> ChIP-seq                          |
| <input checked="" type="checkbox"/> | <input type="checkbox"/> Flow cytometry                    |
| <input type="checkbox"/>            | <input checked="" type="checkbox"/> MRI-based neuroimaging |

## Plants

|                       |     |
|-----------------------|-----|
| Seed stocks           | n/a |
| Novel plant genotypes | n/a |
| Authentication        | n/a |

## Magnetic resonance imaging

## Experimental design

|                                 |                                                                                                           |
|---------------------------------|-----------------------------------------------------------------------------------------------------------|
| Design type                     | structural anatomical scans                                                                               |
| Design specifications           | no experimental design; whole brain scans were collected for electrode localization only.                 |
| Behavioral performance measures | no behavioral performance measures were gathered; anatomical scans were collected for electrode location. |

## Acquisition

|                               |                                                                                                                                                                                                                                                      |
|-------------------------------|------------------------------------------------------------------------------------------------------------------------------------------------------------------------------------------------------------------------------------------------------|
| Imaging type(s)               | structural                                                                                                                                                                                                                                           |
| Field strength                | 3T                                                                                                                                                                                                                                                   |
| Sequence & imaging parameters | All scans were 3D T1-weighted ~1mm voxel isotropic, collected clinically. Scan protocol depended on the location where the scans were collected. GE scans were collected with FSPGR protocol, and Siemens scans were collected with MPRAGE protocol. |
| Area of acquisition           | whole brain scan                                                                                                                                                                                                                                     |
| Diffusion MRI                 | <input type="checkbox"/> Used <input checked="" type="checkbox"/> Not used                                                                                                                                                                           |

## Preprocessing

|                            |                                                                                                                                                                            |
|----------------------------|----------------------------------------------------------------------------------------------------------------------------------------------------------------------------|
| Preprocessing software     | Processing was carried out in FreeSurfer (v6), using the standard recon-all pipeline described in Fischel (2012). [Fischel, B. (2012) FreeSurfer. Neuroimage. 62:774-781.] |
| Normalization              | All normalization procedures included in the standard recon-all pipeline were performed.                                                                                   |
| Normalization template     | MNI305 normalization template was used, per standard execution of -talairach as part of standard recon-all pipeline.                                                       |
| Noise and artifact removal | All noise and artifact removal procedures included in the standard recon-all pipeline were performed.                                                                      |
| Volume censoring           | Volume censoring is not performed as part of the standard recon-all pipeline, and was not performed on these data.                                                         |

## Statistical modeling &amp; inference

|                         |                                                                                |
|-------------------------|--------------------------------------------------------------------------------|
| Model type and settings | No statistical modeling or inference was performed on MRI data for this study. |
|-------------------------|--------------------------------------------------------------------------------|

Effect(s) tested

No statistical modeling or inference was performed on MRI data for this study.

Specify type of analysis:  Whole brain  ROI-based  Both

Statistic type for inference

No statistical modeling or inference was performed on MRI data for this study.

(See [Eklund et al. 2016](#))

Correction

No statistical modeling or inference was performed on MRI data for this study.

## Models & analysis

n/a | Involved in the study

Functional and/or effective connectivity

Graph analysis

Multivariate modeling or predictive analysis
